# Supplementary material
Source: PubMed Central journal article supplement (PMC4091150)
Supplement: auto-10-631-s01.pdf [file auto-10-631-s01.pdf]

## **Supplemental Material to:**

**Norihiko Furuya, Shin-Ichi Ikeda, Shigeto Sato,  
Sanae Soma, Junji Ezaki, Juan Alejandro Oliva Trejo,  
Mitsue Takeda-Ezaki, Tsutomu Fujimura,  
Eri Arikawa-Hirasawa, Norihiro Tada, Masaaki Komatsu,  
Keiji Tanaka, Eiki Kominami, Nobutaka Hattori,  
and Takashi Ueno**

**PARK2/Parkin-mediated mitochondrial clearance  
contributes to proteasome activation during slow-twitch  
muscle atrophy via NFE2L1 nuclear translocation**

**Autophagy 2014; 10(4)**

**<http://dx.doi.org/10.4161/auto.27785>**

**[www.landesbioscience.com/journals/autophagy/article/27785](http://www.landesbioscience.com/journals/autophagy/article/27785)**

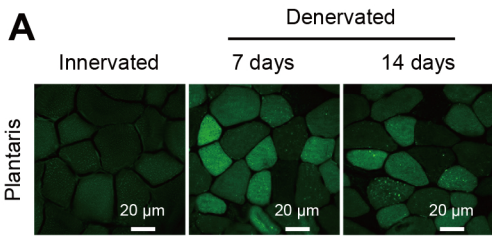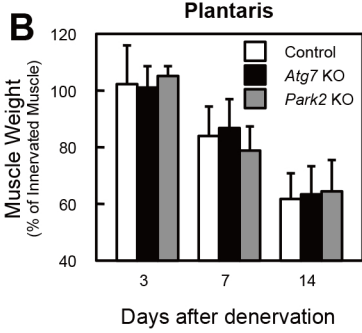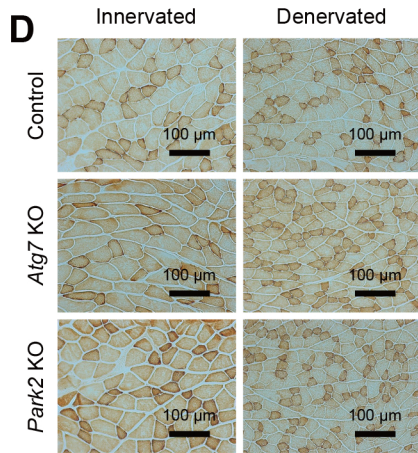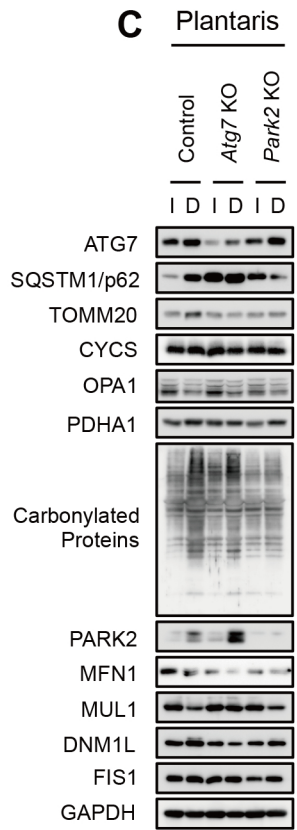

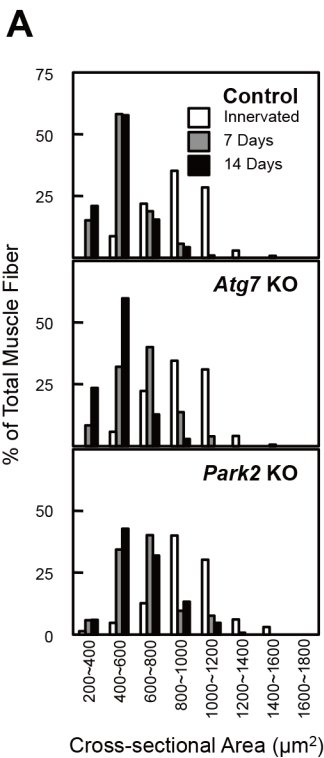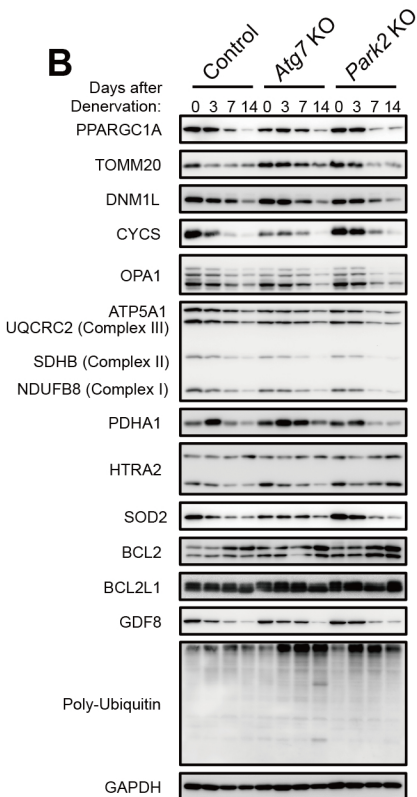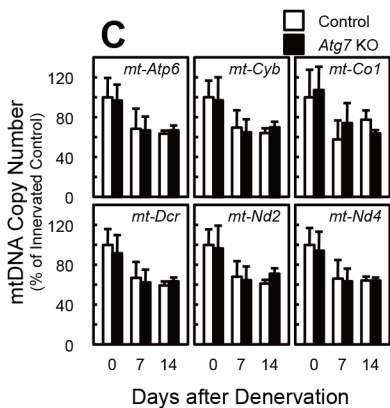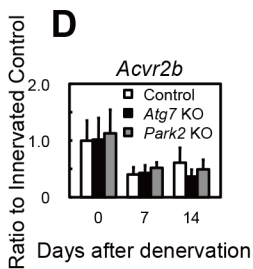

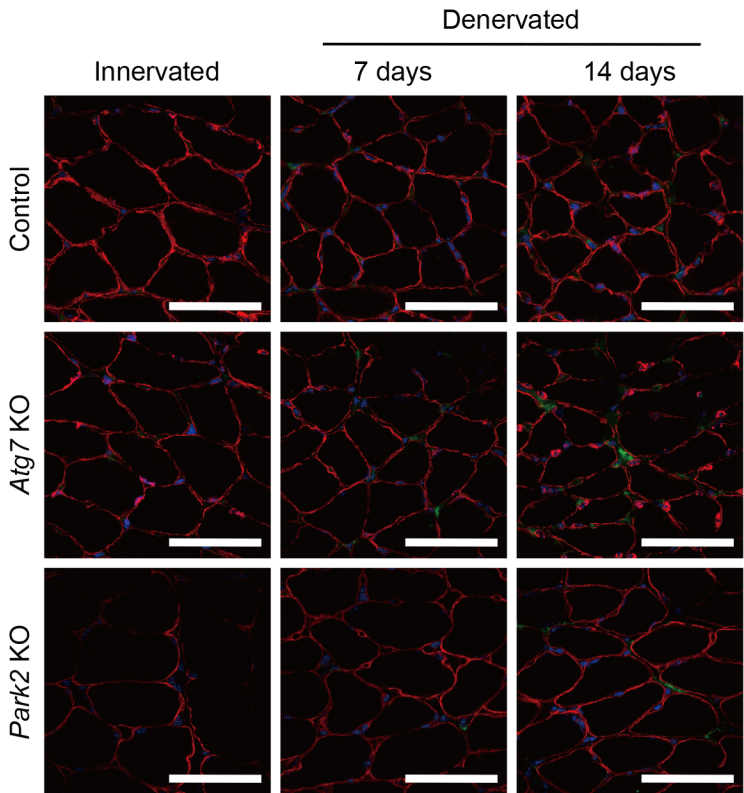

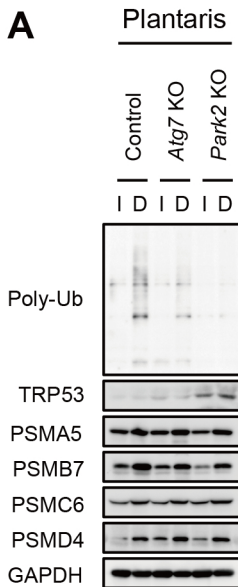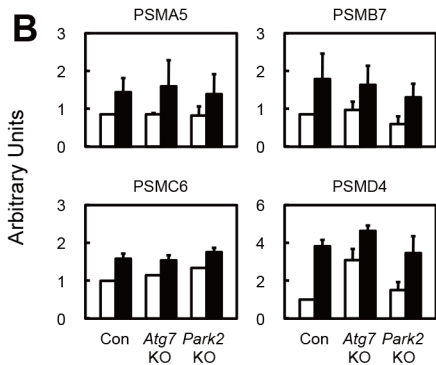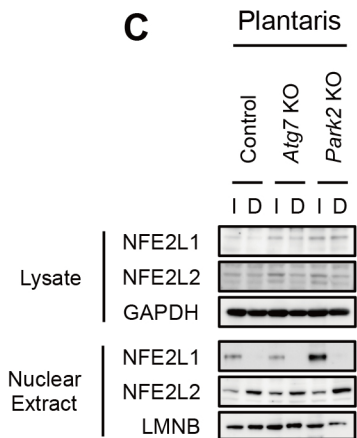

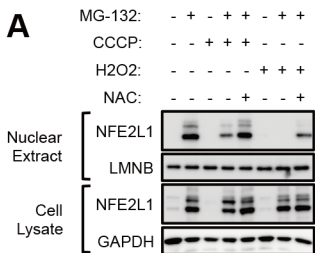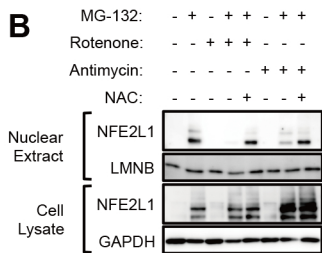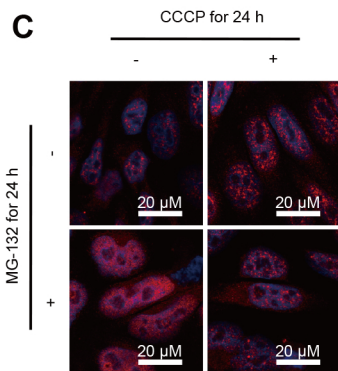

Denervated Control  
Soleus Muscles

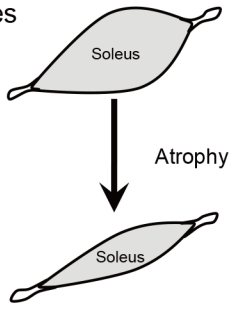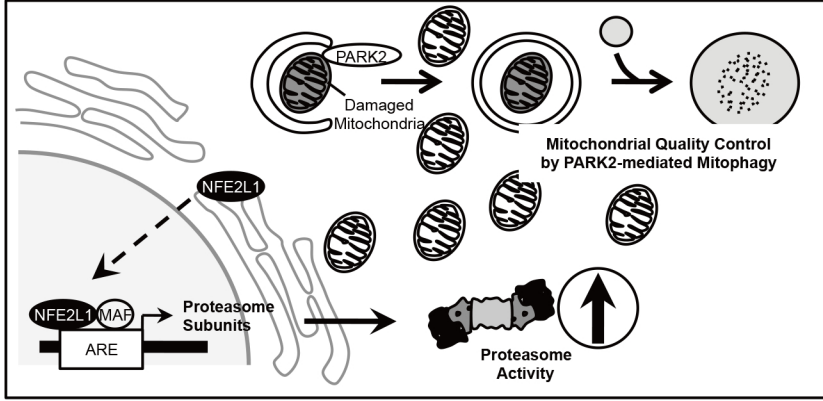

Denervated *Atg7* KO and  
*Park2* KO Soleus Muscles

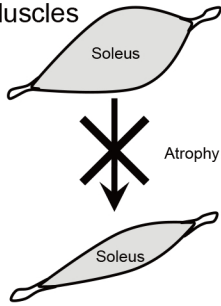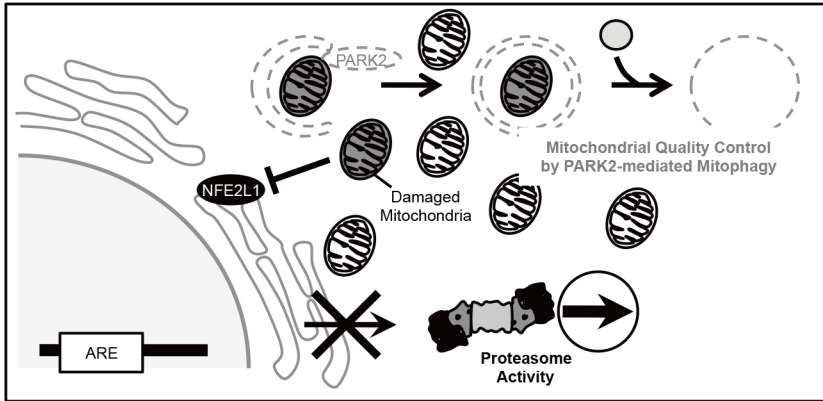

1 **Supplementary Figure Legends**

2 **Figure S1.** Effect of denervation on fast-twitch plantaris muscles. (A) Representative  
3 images of plantaris muscles from GFP-LC3 transgenic mice at 0 (innervated), 7 and 14  
4 days after denervation. Scale bar, 20  $\mu\text{m}$ . (B) Cutting of sciatic nerves was performed.  
5 Denervated plantaris muscle weights are shown as a percentage of the contralateral  
6 innervated muscle weights. Data are shown as means  $\pm$  s.d. (C) Western blot analysis of  
7 plantaris muscles from mice at 7 days after denervation. Whole tissue lysates of the  
8 denervated (D) and the contralateral innervated (I) plantaris muscles were  
9 immunoblotted with antibodies against the indicated proteins. (D) Histochemical  
10 detection of cytochrome *c* oxidase (Cox) activities in cryosections of plantaris muscles  
11 from control, *Atg7* KO and *Park2* KO mice 7 days after denervation. Scale bars, 100  
12  $\mu\text{m}$ .

13

14 **Figure S2.** Time course of changes in muscle and the levels of mitochondrial markers,  
15 myostatin signalling pathway components, and members of the anti-apoptotic BCL2  
16 family in soleus muscles during denervation atrophy. (A) Cross-sectional areas of soleus



17 muscle fibres from denervated mice at seven days (grey bars) or 14 days (closed bars)  
18 post-denervation or innervated mice (open bars) were quantified using imageJ software.  
19 **(B)** Whole tissue lysates of soleus muscles at 0, 3, 7 and 14 days after denervation were  
20 immunoblotted with antibodies against the indicated proteins. The data shown are  
21 representative of at least 3 separate experiments. **(C)** The time course of the changes in  
22 mtDNA copy numbers in denervated soleus muscles from *Atg7* KO and control mice.  
23 mtDNA copy numbers were quantified by real-time PCR to detect mtDNA-encoded  
24 genes. Data are shown as the ratios (mean  $\pm$  s.d.) to the mRNA levels obtained from  
25 innervated soleus muscles from control mice. **(D)** *Acvr2b* (myostatin receptor) mRNA  
26 levels in soleus muscles were quantified by real-time PCR. Data are shown as the ratios  
27 (mean  $\pm$  s.d.) to the mRNA levels obtained from innervated soleus muscles from control  
28 mice.

29

30 **Figure S3.** Accumulation of reactive oxygen species in the soleus muscles of  
31 denervated *Atg7* KO and *Park2* KO mice. Immunofluorescence images of denervated  
32 soleus muscles stained with anti-8-OHdG (an oxidative stress marker, green) and

33 anti-DMD (red) antibodies. Nuclei were visualized with Hoechst 33342 (blue). Bar, 20  
34  $\mu\text{m}$ .

35

36 **Figure S4.** Denervation induces the expression of proteasome subunits in plantaris  
37 muscles. **(A)** Total tissue lysates of denervated and innervated plantaris muscles were  
38 immunoblotted using antibodies against the indicated proteins. **(B)** The levels of  
39 mRNAs for proteasome subunits in plantaris muscles were quantified by real-time PCR.  
40 **(C)** Nuclear levels of Nrfs in plantaris muscles. Nuclear extracts and total lysates of  
41 plantaris muscles were immunoblotted with anti-NFE2L1, anti-NFE2L2, anti-LMNB  
42 and anti-GAPDH antibodies.

43

44 **Figure S5.** Effects of mitochondrial inhibitors on NFE2L1 nuclear translocation. **(A,B)**  
45 NFE2L1 levels in the cell lysates and nuclear extracts of C2C12 cells incubated with 10  
46  $\mu\text{M}$  CCCP, 250  $\mu\text{M}$   $\text{H}_2\text{O}_2$  and/or 10  $\mu\text{M}$  MG-132 **(A)**, or with 5  $\mu\text{g/ml}$  rotenone, 5  $\mu\text{M}$   
47 antimycin and/or 10  $\mu\text{M}$  MG-132 **(B)** in the presence or absence of 10 mM NAC, for 24  
48 h were assayed by western blotting with anti-NFE2L1, anti-LMNB (as a loading control

49 for nuclear extracts) and anti-GAPDH (as a loading control for cell lysates) antibodies.

50 (C) HeLa cells incubated with MG-132 and/or CCCP for 24 h were immunostained

51 with anti-NFE2L1 antibody (red). Nuclei were visualized with Hoechst 33342 (blue).

52

53 **Figure S6.** Scheme of the contribution of PARK2-mediated mitophagy to soleus muscle

54 atrophy. In soleus muscle from *Atg7* KO and *Park2* KO mice, owing to a lack of

55 PARK2-mediated mitophagy, damaged mitochondria are accumulated following

56 denervation. ROS produced by damaged mitochondria interfere with the activation of

57 the transcription factor NFE2L1, which regulates expression of proteasome subunits.

58 Consequently, a delay in soleus muscle atrophy occurs. Conversely, the increase in the

59 number of proteasomes following NFE2L1 activation causes atrophy of the soleus

60 muscle from denervated wild-type animals, because of the maintenance of

61 mitochondrial quality by PARK2-mediated mitophagy.

**Table S1**

The following primers were used for quantitative RT-PCR experiments.

| <b>Gene</b>   | <b>Forward Primer</b>   | <b>Reverse Primer</b>     |
|---------------|-------------------------|---------------------------|
| <i>Park2</i>  | AAACCGGATGAGTGGTGAGT    | AGCTACCGACGTGTCCTTGT      |
| <i>Fbxo32</i> | CACATTCTCTCCTGGAAGGGC   | TTGATAAAGTCTTGAGGGGAAAGTG |
| <i>Trim63</i> | TGGTGAAAACATCATTGACATC  | GTTGATCTTCTCGTCTTCGTGTTT  |
| <i>Acvr2b</i> | ACTGGGAGCTGGAGCGCACCAAC | GAAGTTGCCTTCGCAGCAGCAGAA  |
| <i>Psm17</i>  | AACGTCTGTATGGCCTTTGC    | GTCCTGGGTCCTCCACTGT       |
| <i>Psm14</i>  | TTCCTGGCCACTGGTTATG     | CGAACGGGCATCTCTGTAGT      |
| <i>Pamc4</i>  | TGGTCA TCGGTGAGTTCTTG   | CGGTGATGGTACTCAGGAT       |
| <i>Psm11</i>  | GGGGCTTTTGAGGAGTCTCT    | GCAA TCTGCA TTTTCCACA     |
| <i>Gapdh</i>  | CACCATCTTCCAGGAGCGAG    | CCTTCTCCATGGTGGTGAAGAC    |

**Table S2**

The following primers were used for quantification of mtDNA copy numbers

| <b>Gene</b>    | <b>Forward Primer</b>     | <b>Reverse Primer</b>    |
|----------------|---------------------------|--------------------------|
| <i>mt-Co1</i>  | ACTATACTACTACTAACAGACCG   | GGTTCTTTTTTTCCGGAGTA     |
| <i>mt-Nd2</i>  | CACGATCAACTGAAGCAGCAA     | ACGATGGCCAGGAGGATAATT    |
| <i>mt-Nd4</i>  | ATTATTATTACCCGATGAGGGAACC | ATTAAGATGAGGGCAATTAGCAGT |
| <i>mt-Cyb</i>  | GCCACCTTGACCCGATTCT       | TTGCTAGGGCCGCGATAAT      |
| <i>mt-Atp6</i> | AATTACAGGCTTCCGACACAAAC   | TGGAATTAGTGAAATTGGAGTTCC |
| <i>mt-Dcr</i>  | AATCTACCATCCTCCGTGAAACC   | GCCCGAGCGAGAAGAG         |
| <i>Ppia</i>    | ACACGCCATAATGGCACTGG      | CAGTCTTGGCAGTGCAGAT      |
